# Supplementary material for: Stroke prevention by traditional Chinese medicine? A genetic algorithm, support vector machine and molecular dynamics approach
Source: Royal Society of Chemistry journal article supplement (doi:10.1039/c0sm01548b), 2011-01-01
Supplement: c0sm01548b.pdf [file c0sm01548b.pdf]

Supplementary Table S1. The calculated values of descriptors for the training set and the test set

| Compound | Dipole mag | Dipole Y | Jurs<br>FNSA3 | Jurs<br>PPSA3 | Jurs<br>RASA | Jurs<br>RNCG | Jurs<br>TASA | Jurs<br>WPSA3 | Shadow<br>Xlength | Shadow<br>Ylength |
|----------|------------|----------|---------------|---------------|--------------|--------------|--------------|---------------|-------------------|-------------------|
| 1        | 2.78276    | -1.85793 | -0.05817      | 12.0497       | 0.789        | 0.2978       | 298.81       | 4.56342       | 9.37799           | 8.52986           |
| 2        | 2.5589     | -1.26552 | -0.04745      | 16.5446       | 0.84229      | 0.23384      | 410.865      | 8.07037       | 12.8588           | 9.40876           |
| 3        | 3.31546    | -2.83955 | -0.04061      | 14.9006       | 0.89471      | 0.24733      | 430.263      | 7.16562       | 13.4578           | 9.43588           |
| 4        | 4.65281    | -3.82274 | -0.03728      | 19.2707       | 0.89051      | 0.20897      | 480.867      | 10.406        | 14.8058           | 9.9906            |
| 5        | 3.41185    | 0.60589  | -0.04644      | 20.3258       | 0.8804       | 0.1896       | 500.466      | 11.5542       | 14.1567           | 11.0177           |
| 6        | 2.68052    | -0.09197 | -0.09043      | 10.8268       | 0.91262      | 0.14948      | 527.771      | 6.26112       | 14.4093           | 10.303            |
| 7        | 2.59092    | 0.21141  | -0.15432      | 15.9672       | 0.60909      | 0.15608      | 336.145      | 8.81193       | 14.5949           | 9.88243           |
| 8        | 3.7454     | -0.37094 | -0.02844      | 17.3717       | 0.91604      | 0.22049      | 531.499      | 10.0793       | 15.9051           | 10.6028           |
| 9        | 1.92571    | -0.12104 | -0.04388      | 17.2537       | 0.87717      | 0.23543      | 466.816      | 9.18205       | 15.6689           | 9.54921           |
| 10       | 4.41717    | 4.14814  | -0.1079       | 15.8292       | 0.72291      | 0.22021      | 378.155      | 8.28024       | 14.7858           | 9.52694           |
| 11       | 3.1645     | -0.74749 | -0.04351      | 19.7569       | 0.87361      | 0.21326      | 439.863      | 9.94757       | 14.3665           | 9.62304           |
| 12       | 3.06725    | -0.49263 | -0.04342      | 14.4146       | 0.90355      | 0.24398      | 447.759      | 7.14322       | 13.3188           | 9.9803            |
| 13       | 7.37706    | 4.53465  | -0.10673      | 16.2572       | 0.72684      | 0.21876      | 382.49       | 8.55511       | 15.1703           | 9.68291           |
| 14       | 6.13607    | 4.03917  | -0.10946      | 23.432        | 0.81464      | 0.13901      | 715.551      | 20.5818       | 19.7473           | 15.8236           |
| 15       | 1.54519    | 1.4911   | -0.03183      | 25.9381       | 0.91858      | 0.24776      | 548.678      | 15.493        | 16.042            | 10.8469           |
| 16       | 2.78591    | 0.24692  | -0.03849      | 31.9212       | 0.89304      | 0.16359      | 666.404      | 23.8202       | 20.8062           | 13.9337           |
| 17       | 2.43796    | 1.35655  | -0.03342      | 25.6676       | 0.94738      | 0.21717      | 612.39       | 16.5915       | 16.7607           | 13.6542           |
| 18       | 1.77607    | 0.47718  | -0.03378      | 25.2616       | 0.94999      | 0.2228       | 621.636      | 16.5302       | 16.5068           | 13.8092           |
| 19       | 2.89826    | -0.879   | -0.05094      | 24.6934       | 0.95227      | 0.17527      | 652.879      | 16.9297       | 17.9965           | 13.8449           |
| 20       | 2.35497    | 0.85069  | -0.05661      | 24.5922       | 0.95021      | 0.16199      | 730.835      | 18.9146       | 20.6951           | 14.507            |
| 21       | 2.68656    | 1.34334  | -0.04397      | 25.6674       | 0.91821      | 0.21085      | 633.342      | 17.7041       | 20.2177           | 12.2305           |
| 22       | 1.54779    | -0.54301 | -0.03352      | 25.8542       | 0.97119      | 0.21692      | 704.109      | 18.7441       | 20.8512           | 13.3689           |
| 23       | 3.90607    | 1.49209  | -0.05612      | 27.7189       | 0.94807      | 0.16527      | 725.075      | 21.1992       | 21.0786           | 14.4328           |
| 24       | 6.85898    | 6.02415  | -0.10047      | 24.1036       | 0.85555      | 0.18685      | 626.781      | 17.6583       | 19.7113           | 14.1777           |
| 25       | 3.83066    | 3.57582  | -0.06846      | 33.9028       | 0.80929      | 0.13989      | 605.66       | 25.3721       | 18.7472           | 14.6629           |
| 26       | 3.44031    | -1.58935 | -0.04878      | 32.2548       | 0.90279      | 0.16526      | 748.165      | 26.7302       | 20.953            | 14.6403           |
| 27       | 5.19194    | -0.37084 | -0.0782       | 18.9891       | 0.85891      | 0.2448       | 518.796      | 11.4697       | 13.9155           | 12.588            |
| 28       | 2.07557    | -1.67035 | -0.05583      | 27.6883       | 0.80763      | 0.16681      | 502.381      | 17.2231       | 17.2342           | 11.9378           |
| 29       | 0.55285    | -0.0224  | -0.04953      | 27.8374       | 0.7957       | 0.1816       | 461.852      | 16.1577       | 17.8899           | 10.5882           |
| 30       | 0.74181    | 0.08698  | -0.04534      | 28.5254       | 0.81482      | 0.17159      | 505.58       | 17.6993       | 18.0212           | 10.1882           |
| 31       | 2.10003    | -1.56202 | -0.063        | 28.5748       | 0.7923       | 0.1674       | 464.588      | 16.7554       | 18.1942           | 10.015            |
| 32       | 2.34709    | -2.22452 | -0.06504      | 29.3756       | 0.74095      | 0.15866      | 431.723      | 17.116        | 18.0042           | 10.2494           |
| 33       | 1.23523    | -0.96696 | -0.06861      | 28.7226       | 0.73874      | 0.18109      | 425.853      | 16.5573       | 17.8784           | 10.3972           |
| 34       | 0.66456    | -0.03668 | -0.04666      | 30.1304       | 0.81832      | 0.16263      | 515.526      | 18.9815       | 17.9268           | 11.4818           |
| 35       | 2.41743    | 0.54271  | -0.0488       | 27.8519       | 0.83252      | 0.15845      | 563.533      | 18.8528       | 17.1663           | 13.9436           |
| 36       | 0.95777    | 0.03678  | -0.05483      | 28.218        | 0.79823      | 0.17319      | 478.098      | 16.901        | 17.9719           | 10.097            |
| 37       | 1.55824    | 0.76292  | -0.05503      | 27.4262       | 0.80397      | 0.17582      | 471.195      | 16.074        | 17.8504           | 9.3711            |

|     |         |          |          |         |         |         |         |         |         |         |
|-----|---------|----------|----------|---------|---------|---------|---------|---------|---------|---------|
| 38  | 0.9003  | 0.4605   | -0.05385 | 28.4752 | 0.78499 | 0.16289 | 487.383 | 17.6796 | 18.6799 | 9.44385 |
| 39  | 1.1439  | 0.39651  | -0.05314 | 31.313  | 0.77623 | 0.15897 | 468.936 | 18.9166 | 18.0134 | 10.1944 |
| 40  | 0.72785 | -0.26007 | -0.04521 | 29.738  | 0.81858 | 0.16493 | 523.663 | 19.0239 | 19.1053 | 10.135  |
| 41  | 2.12939 | -1.17769 | -0.05156 | 32.3119 | 0.79374 | 0.15978 | 515.168 | 20.9715 | 20.4443 | 9.73426 |
| 42  | 0.66136 | 0.27894  | -0.052   | 26.6295 | 0.81283 | 0.17174 | 505.37  | 16.5566 | 18.709  | 9.93407 |
| 43  | 3.04909 | -1.30008 | -0.05118 | 26.2699 | 0.83067 | 0.1613  | 554.984 | 17.5512 | 19.1383 | 10.1745 |
| 44  | 0.89458 | 0.60099  | -0.04554 | 29.9966 | 0.83425 | 0.16128 | 576.348 | 20.7233 | 17.7011 | 10.9824 |
| 45  | 1.65929 | -1.20962 | -0.04838 | 32.5593 | 0.81315 | 0.15499 | 548.073 | 21.9453 | 20.0277 | 9.54898 |
| 46  | 1.81165 | -1.25123 | -0.05209 | 31.1867 | 0.80736 | 0.15467 | 538.979 | 20.8195 | 19.5698 | 9.43299 |
| 47  | 3.5703  | -2.86791 | -0.0558  | 25.6622 | 0.82633 | 0.1714  | 573.544 | 17.8117 | 20.0601 | 9.76527 |
| 48  | 2.34528 | -1.28392 | -0.05007 | 23.9364 | 0.83201 | 0.18014 | 535.002 | 15.3916 | 19.4559 | 9.58421 |
| 49  | 2.55553 | -1.71448 | -0.05137 | 25.3696 | 0.82831 | 0.17783 | 529.941 | 16.2309 | 19.082  | 9.27963 |
| 50  | 1.15623 | -0.97088 | -0.04708 | 25.0808 | 0.83515 | 0.18042 | 571.263 | 17.1558 | 18.9143 | 10.4893 |
| 51  | 3.79488 | -2.93055 | -0.06774 | 25.4094 | 0.76594 | 0.16039 | 479.452 | 15.9053 | 18.9844 | 9.90205 |
| 52* | 4.76684 | -4.25548 | -0.04161 | 20.0674 | 0.92129 | 0.21012 | 536.638 | 11.689  | 15.7049 | 12.7305 |
| 53* | 2.72328 | 0.39471  | -0.06768 | 13.1035 | 0.88186 | 0.17177 | 489.167 | 7.26843 | 16.2486 | 9.55387 |
| 54* | 4.59749 | 3.67342  | -0.13135 | 16.0947 | 0.72571 | 0.20413 | 401.007 | 8.89335 | 14.7079 | 9.53877 |
| 55* | 2.98662 | -0.7448  | -0.03827 | 28.6251 | 0.95668 | 0.19701 | 694.092 | 20.7681 | 20.3908 | 14.099  |
| 56* | 0.88393 | -0.85702 | -0.03442 | 26.2079 | 0.98089 | 0.22002 | 667.619 | 17.8377 | 20.362  | 11.6841 |
| 57* | 1.59421 | -0.71937 | -0.03366 | 28.3439 | 0.9683  | 0.19124 | 737.254 | 21.5807 | 20.0176 | 15.2617 |
| 58* | 0.70933 | 0.05054  | -0.04786 | 28.2216 | 0.8029  | 0.17651 | 483.673 | 17.0009 | 17.8769 | 10.3624 |
| 59* | 0.73787 | -0.03813 | -0.06173 | 32.4008 | 0.7324  | 0.15005 | 434.353 | 19.2154 | 17.7839 | 9.52603 |
| 60* | 0.68174 | -0.23514 | -0.04561 | 30.0019 | 0.8142  | 0.16495 | 519.299 | 19.135  | 19.0043 | 10.0527 |
| 61* | 2.08849 | -0.49807 | -0.05448 | 31.4546 | 0.78768 | 0.15953 | 506.869 | 20.2408 | 20.0348 | 9.86939 |
| 62* | 1.75227 | 0.63003  | -0.04546 | 28.642  | 0.83314 | 0.16771 | 544.142 | 18.7065 | 18.3721 | 9.25482 |

\*: test set compound
